# Supplementary material
Source: PubMed Central journal article supplement (PMC11640573)
Supplement: boe-15-12-6670-s001.pdf [file boe-15-12-6670-s001.pdf]

## Simultaneous 2-photon and 3-photon excitation with a red fluorescent protein-cyanine dye probe pair in the 1700-nm excitation window for deep *in vivo* neurovascular imaging: supplement

FEI XIA,<sup>1,2,3</sup>  DAVID SINEFELD,<sup>1,4</sup> ZONG CHANG,<sup>5</sup> XIAOJING GONG,<sup>5,6</sup>  AND QINCHAO SUN<sup>5,7</sup>

<sup>1</sup>*School of Applied and Engineering Physics, Cornell University, Ithaca, New York, USA*

<sup>2</sup>*Meinig School of Biomedical Engineering, Cornell University, Ithaca, New York, USA*

<sup>3</sup>*Present address: Laboratoire Kastler Brossel, ENS-PSL Research University, CNRS, Sorbonne Université, Collège de France, Paris, France*

<sup>4</sup>*Present address: Department of Applied Physics and Electro-Optical Engineering, Jerusalem College of Technology, Jerusalem, Israel*

<sup>5</sup>*Guangdong Provincial Key Laboratory of Biomedical Optical Imaging Technology, Center for Biomedical Optics and Molecular Imaging, Shenzhen Institute of Advanced Technology, Chinese Academy of Sciences, Shenzhen 518055, China*

<sup>6</sup>*xj.gong@siat.ac.cn*

<sup>7</sup>*Qchao.sun@siat.ac.cn*

---

This supplement published with Optica Publishing Group on 5 November 2024 by The Authors under the terms of the [Creative Commons Attribution 4.0 License](https://creativecommons.org/licenses/by/4.0/) in the format provided by the authors and unedited. Further distribution of this work must maintain attribution to the author(s) and the published article's title, journal citation, and DOI.

Supplement DOI: <https://doi.org/10.6084/m9.figshare.27266478>

Parent Article DOI: <https://doi.org/10.1364/BOE.534688>

# SIMULTANEOUS 2-PHOTON AND 3-PHOTON EXCITATION WITH A RED FLUORESCENT PROTEIN-CYANINE DYE PROBE PAIR IN THE 1700-NM EXCITATION WINDOW FOR DEEP IN VIVO NEUROVASCULAR IMAGING

FEI XIA<sup>2,3,4</sup>, DAVID SINEFELD<sup>5,2</sup>, ZONG CHANG<sup>1</sup>, XIAOJING GONG<sup>\*,1</sup>, QINCHAO SUN<sup>\*,1</sup>

<sup>1</sup>Guangdong Provincial Key Laboratory of Biomedical Optical Imaging Technology, Center for Biomedical Optics and Molecular Imaging, Shenzhen Institute of Advanced Technology, Chinese Academy of Sciences, Shenzhen 518055, China,

<sup>2</sup>School of Applied and Engineering Physics, Cornell University, Ithaca, USA

<sup>3</sup>Meinig School of Biomedical Engineering, Cornell University, Ithaca, USA

<sup>4</sup>Present address: Laboratoire Kastler Brossel, ENS-PSL Research University, CNRS, Sorbonne Université, Collège de France, Paris, France

<sup>5</sup>Present address: Department of Applied Physics and Electro-Optical Engineering, Jerusalem College of Technology, Jerusalem, Israel

\*Corresponding authors: Xiaojing Gong: [xj.gong@siat.ac.cn](mailto:xj.gong@siat.ac.cn), Qinchao Sun: [Qchao.sun@siat.ac.cn](mailto:Qchao.sun@siat.ac.cn)

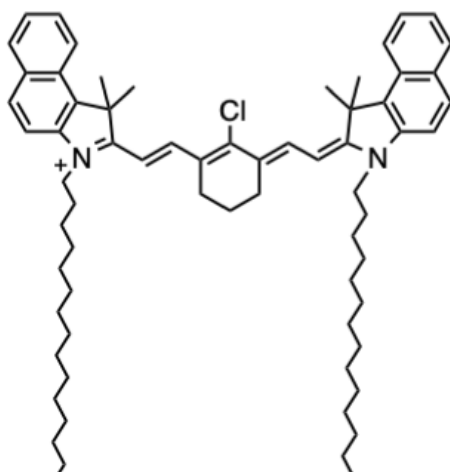

**Figure S1.** Molecular structures of Q820.

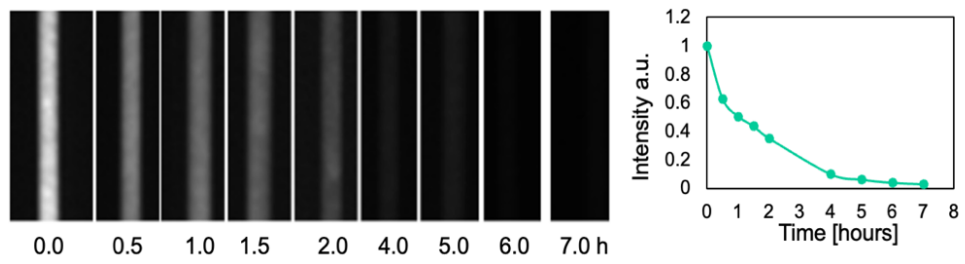

Figure S2. Circulation time of Q820@BSA in the blood. The circulation time was measured by collecting blood from a capillary and measuring the emitted fluorescence intensity. Left: Images of emitted fluorescence from a capillary at different circulation times (in hours). Right: Normalized fluorescence intensity over time. Q820@BSA remains in circulation for an extended period, with a half-life of approximately 2 hours.
